# Supplementary material for: The dual molecular identity of vestibular kinocilia bridges structural and functional traits of primary and motile cilia
Source: eLife. 2026 Apr 24;14:RP108071. doi: 10.7554/eLife.108071 (PMC13108966; doi:10.7554/eLife.108071)
Supplement: Supplementary file 2. — Missing genes in mouse vestibular hair cells are in red. [file elife-108071-supp2.xlsx]

## Sheet: Sheet1
	Table S2. Genes/ Gene products candidates associated with axonemal components in vestibular kinocilia derived from the 96-nm repeat structures of the human respiratory axoneme (PDB: 8J07). Missing genes in mouse vestibular hair cells are in red
	Axonemal complex	Axonemal protein	Present in this study	Gene/Transcript in this study
	ODA	DNAH5	Yes
		DNAH9	Yes
		DNAI1/Dnaic1	Yes	Dnaic1
		DNAI2/Dnaic2	Yes	Dnaic2
		DNAL1	Yes
		DYNLRB1	Yes
		DYNLRB2	Yes
		DYNLL1 (and/or DYNLL2)	Yes
		DYNLT2B (and/or DYNLT2, DYNLT4)	Yes	DYT2B
		DYNLT1 (and/or DYNLT3) (TCTEX1)	Yes	DYLT1
		NME9	Yes
	ODA-DC	ODAD1 (CCDC114)	Yes	CCDC114
		ODAD2 (ARMC4)	Yes	ARMC4
		ODAD3 (CCDC151)	Yes	CCDC151
		ODAD4 (TTC25)	Yes	TTC25
		ODAD5 (clxn, EFCAB1)	Yes	EFCAB1
	IDAf	DNAH2	Yes
		DNAH10	Yes
		DNAI3/(WDR63)	Yes	WDR63
		DNAI4/(WDR78)	Yes	WDR78
		DNAI7/LAS1/CFAP94/CASC1	Yes	CASC1
		DYNLRB1	Yes
		DYNLRB2	Yes
		DYNLT2B (and/or DYNLT2, DYNLT4)	Yes	DYT2B/ Tctex1d2
		DYNLT1 (and/or DYNLT3) (TCTEX1)	Yes	Dynlt3
		CFAP57	Yes
		LRRC51/DFNB63	Yes
	MIA	CFAP73	Yes
		CFAP100/CCDC37	No
	T/TH	CFAP43	Yes
		CFAP44	Yes
	Single head-IDAs	DNAH1(IDAd)	Yes
		DNAH3(IDAc)	No
		DNAH6(IDAg)	Yes
		DNAH7(IDAb/e)	Yes
		DNAH12 (IDAa)	No
		DNALI1(IDAa)	Yes
		CEN2	Yes	CETN2
		ACTA2	No
		TTC29	Yes
		ZMYND12	Yes
	N-DRC	DRC1/CCDC164	Yes	DRC1
		DRC2/CCDC65	Yes	CCDC65
		DRC3/LRRC48	Yes	DRC3
		DRC4/GAS8	Yes	GAS8
		DRC5/TCTE1	Yes	TCTE1
		DRC7	Yes	DRC7
		DRC8/CCDC135	Yes	EFCAB2
		DRC9/IQCG	Yes	IQCG
		DRC10/IQCD	Yes	IQCD
		DRC11/IQCA	Yes	IQCA
		ANKEF1	Yes
	RS	CALM1	Yes
		CYB5D1	Yes
		DNAJB13	Yes
		DYDC2	Yes
		DYNLL1	Yes
		IQUB	Yes
		LRRC34	Yes
		MORN3	No
		NME5	Yes
		PPIL6	Yes
		ROPN1L	Yes
		RSPH1	Yes
		RSPH3	Yes
		RSPH4A	Yes
		RSPH9	Yes
		RSPH14	Yes
		SPA17	Yes
		AK7	Yes
		AK9	Yes
		AKAP14	Yes
		CATIP	Yes
		LRRC23	Yes
		MDH1A	Yes
		MDH1B	Yes
		MORN5	Yes
		PRKACA	Yes
		PRKAR1A/1B	Yes
		STYXL1	Yes
		AK8	Yes
		CFAP206	Yes
		EFCAB10	Yes
		LRP2BP	Yes
		RGS22	Yes
		LRRC23	Yes
		CFAP91/MAATS1	Yes	MAATS1
		CFAP69	Yes
		FAP251/WDR66	Yes	WDR66
	MIPs	CFAP20	Yes
		CFAP45	Yes
		CFAP52	Yes
		CFAP53	Yes
		CFAP68	No
		CFAP77	Yes
		CFAP90	No
		CFAP95	No
		CFAP107	No
		CFAP126	Yes
		CFAP141	No
		CFAP161	Yes
		CFAP210/CCDC173	Yes	CCDC173
		CFAP276	No
		EFHC1	Yes
		EFHC2	Yes
		ENKUR	Yes
		FAM166B//CIMIP2B	No
		FAM183A/CFAP144	No
		FAM166C	No
		MNS1	Yes
		NME7	Yes
		PACRG	Yes
		Pierce 1	No
		Pierce 2	No
		RIBC1	Yes
		RIBC2	Yes
		SPACA9	Yes
		SPAG8	Yes
		Tektin 1/Tekt1	Yes	Tekt1
		Tektin 2/Tekt2	Yes	Tekt2
	External coiled coils	CCDC39	Yes
		CCDC40	Yes
		CCDC96	Yes
		CCDC113	Yes
		CFAP299	Yes
		CFAP58	Yes
		CCDC146	Yes
		ARMH1	Yes
