# Supplementary material for: The dual molecular identity of vestibular kinocilia bridges structural and functional traits of primary and motile cilia
Source: eLife. 2026 Apr 24;14:RP108071. doi: 10.7554/eLife.108071 (PMC13108966; doi:10.7554/eLife.108071)
Supplement: Supplementary file 3. [file elife-108071-supp3.xlsx]

## Sheet: Sheet1
	Microtubule inner proteins (MIPs) and microtubule-associated proteins (MAPs) absent from mouse HC scRNA-seq data. These genes structurally resolved in the 96-nm axonemal repeats of human respiratory and/or bovine sperm flagella (PDB: 8J07, 9FQR). While most of these proteins are not known to directly regulate motility, a few such as Pierce1 and Pierce2 are linked to defects in ciliary motility an…
	Axonemal complex	Missing genes	Corresponding PDB model	Effect on motility/Cilia-related disease
	MIPs and MAPs	CFAP68	8J07/9FQR	Unknown
		CFAP90	8J07/9FQR	Unknown
		CFAP95	8J07/9FQR	Unknown
		CFAP107	8J07/9FQR	Unknown
		CFAP141	8J07/9FQR	Unknown
		CFAP276	8J07/9FQR	Unknown
		FAM166B	8J07/9FQR	Unknown
		FAM183A	8J07/9FQR	Unknown
		FAM166C	8J07/9FQR	Unknown
		Pierce1	8J07/9FQR	LR asymmetry Defect on ciliary motility and laterality
		Pierce2	8J07/9FQR	LR asymmetry Defect on ciliary motility and laterality
		SPMIP1	9FQR	Unknown
		CIMIP1	9FQR	Unknown
		SPMAP1	9FQR	Unknown
		CFAP144	9FQR	Unknown
		CFAP263	9FQR	Unknown
		CIMAP1B	9FQR	Unknown
		CIMAP1C	9FQR	Unknown
		CIMIP3	9FQR	Unknown
		CCDC105	9FQR	Unknown
		DUSP21	9FQR	Unknown
		EFCAB3	9FQR	Unknown
		ODF3	9FQR	Unknown
		SIMIP4	9FQR	Unknown
		SPMIP7	9FQR	Unknown
		SPMIP5	9FQR	Unknown
		SPMIP6	9FQR	Unknown
		SAXO3	9FQR	Unknown
		TEKTIP1	9FQR	Unknown
		Tektin-5	9FQR	Unknown
		SPMIP8	9FQR	Unknown
		TEX33	9FQR	Unknown
		TEX49	9FQR	Unknown
		TSSK6	9FQR	Unknown
		TEX37	9FQR	Unknown
		THEGL	9FQR	Unknown
		CFAP96	9FQR	Unknown
		CFAP299	9FQR	Unknown
